# Supplementary material for: Salt Tolerant Eggplant Rootstocks Modulate Sodium Partitioning in Tomato Scion and Improve Performance under Saline Conditions
Source: MDPI journal article supplement (doi:10.3390/agriculture12020183), 2022-01-27
Supplement: s1 [file agriculture-1539496-supplementary.pdf › agriculture-1539496-supplementary.pdf]

## Supplementary Tables

Ref. No.: Agriculture-1539496

**Table S1.** Analysis of variance (ANOVA) for yield components and physiological parameters of tomato (cv. Kashi Aman)

| Source of variation         | DF | Mean Squares      |                   |                                      |             |            |          |
|-----------------------------|----|-------------------|-------------------|--------------------------------------|-------------|------------|----------|
|                             |    | Plant height (cm) | Av. Fruit wt. (g) | Fruit yield (g.plant <sup>-1</sup> ) | TSS (°Brix) | SPAD index | RWC (%)  |
| Year                        | 1  | 15.41**           | 117.93**          | 230143.33**                          | 0.002       | 100.23     | 18.19    |
| Replication                 | 4  | 0.16              | 0.62              | 986.16                               | 0.011*      | 14.38      | 32.11**  |
| Salinity                    | 2  | 905.58**          | 1535.90**         | 9527469.83**                         | 3.492*      | 235.69**   | 863.35** |
| Year x Salinity             | 2  | 3.39              | 1.81*             | 41009.20**                           | 0.011*      | 3.90       | 0.85     |
| Error (a)                   | 8  | 1.37              | 0.23              | 374.120                              | 0.003       | 7.54       | 4.70     |
| Rootstock                   | 2  | 81.17**           | 57.39**           | 650060.69**                          | 0.010       | 46.25*     | 76.45    |
| Salinity x Rootstock        | 4  | 8.77              | 20.71**           | 218971.16**                          | 0.010*      | 28.95*     | 24.28    |
| Year x Rootstock            | 2  | 4.16              | 3.02*             | 1503.80                              | 0.005       | 0.20       | 0.58     |
| Year x Salinity x Rootstock | 4  | 0.98              | 3.95**            | 9805.79**                            | 0.004       | 0.56       | 0.57     |
| Error (b)                   | 24 | 3.43              | 0.82              | 1496.87                              | 0.004       | 13.41      | 9.98     |

\*\* significant at  $p$ -value < 0.01. \* significant at  $p$ -value < 0.05

**Table S2.** Analysis of variance (ANOVA) for biochemical parameters

| Source of Variability       | DF | Mean Squares |          |            |            |           |
|-----------------------------|----|--------------|----------|------------|------------|-----------|
|                             |    | Proline      | Catalase | APX        | SOD        | POX       |
| Year                        | 1  | 1472.14**    | 25.74**  | 1129.16**  | 4245.36**  | 21.12     |
| Replication                 | 4  | 50.29        | 0.45     | 15.45      | 123.74     | 4.31      |
| Salinity                    | 2  | 2902183.57** | 50.39**  | 41743.18** | 54273.64** | 1645.39** |
| Year x Salinity             | 2  | 3096.00**    | 0.95     | 23.23      | 4892.33*   | 20.38     |
| Error (a)                   | 8  | 260.04       | 0.45     | 12.26      | 740.48     | 5.41      |
| Rootstock                   | 2  | 138219.99**  | 18.55**  | 686.30**   | 3419.75**  | 185.62**  |
| Salinity x Rootstock        | 4  | 54909.82**   | 2.77**   | 143.35**   | 652.97     | 36.10**   |
| Year x Rootstock            | 2  | 528.89       | 0.35     | 2.70       | 4.05       | 5.18      |
| Year x Salinity x Rootstock | 4  | 456.54       | 0.32     | 6.26       | 240.05     | 4.44      |
| Error (b)                   | 24 | 291.51       | 0.25     | 15.10      | 294.43     | 3.85      |

\*\* significant at  $p$ -value < 0.01. \* significant at  $p$ -value < 0.05

**Table S3.** Analysis of variance (ANOVA) FOR Na<sup>+</sup>, K<sup>+</sup> content and K<sup>+</sup>/Na<sup>+</sup> ratios of root and shoot parts

| Source of Variability       | DF | Mean Squares          |                      |                      |                     |                                          |                                         |
|-----------------------------|----|-----------------------|----------------------|----------------------|---------------------|------------------------------------------|-----------------------------------------|
|                             |    | Shoot Na <sup>+</sup> | Root Na <sup>+</sup> | Shoot K <sup>+</sup> | Root K <sup>+</sup> | K <sup>+</sup> /Na <sup>+</sup> in Shoot | K <sup>+</sup> /Na <sup>+</sup> in Root |
| Year                        | 1  | 0.00                  | 0.25                 | 0.06                 | 0.19**              | 0.001                                    | 0.004                                   |
| Replication                 | 4  | 0.03*                 | 0.03                 | 0.03                 | 0.01                | 0.003                                    | 0.002                                   |
| Salinity                    | 2  | 94.39**               | 162.25**             | 48.49**              | 189.33**            | 17.710**                                 | 31.043**                                |
| Year x Salinity             | 2  | 0.06**                | 0.23**               | 0.18**               | 0.01                | 0.005*                                   | 0.035**                                 |
| Error (a)                   | 8  | 0.01                  | 0.02                 | 0.01                 | 0.03                | 0.001                                    | 0.001                                   |
| Rootstock                   | 2  | 0.42**                | 1.67**               | 1.26**               | 2.35**              | 0.088**                                  | 0.153**                                 |
| Salinity x Rootstock        | 4  | 0.24**                | 0.73**               | 0.42**               | 0.27**              | 0.129**                                  | 0.004                                   |
| Year x Rootstock            | 2  | 0.02                  | 0.05*                | 0.38**               | 0.14*               | 0.009*                                   | 0.002                                   |
| Year x Salinity x Rootstock | 4  | 0.00                  | 0.04**               | 0.07*                | 0.05                | 0.005                                    | 0.001                                   |
| Error (b)                   | 24 | 0.00                  | 0.01                 | 0.02                 | 0.03                | 0.003                                    | 0.002                                   |

\*\* significant at  $p$ -value < 0.01. \* significant at  $p$ -value < 0.05
